# Supplementary material for: CoOx/UiO-66 and NiO/UiO-66 heterostructures with UiO-66 frameworks for enhanced oxygen evolution reactions
Source: Royal Society of Chemistry journal article supplement (doi:10.1039/d1nj01995c), 2021-01-01
Supplement: d1nj01995c1.pdf [file d1nj01995c1.pdf]

## Supporting Information

### **CoO<sub>x</sub>/UiO-66 and NiO/UiO-66 Heterostructures with UiO-66 Frameworks for Enhanced Oxygen Evolution Reactions**

Victor Charles,<sup>a,b,#</sup> Yong Yang,<sup>a,#</sup> Menglei Yuan,<sup>a,b</sup> Jitao Zhang,<sup>f</sup> Yaling Li,<sup>f</sup> Jingxian Zhang,<sup>a,b</sup> Tongkun Zhao,<sup>a,b</sup> Zhanjun Liu<sup>c</sup>, Bin Li<sup>d\*</sup>, Guangjin Zhang,<sup>a,b,e\*</sup>

<sup>a</sup>CAS Key Laboratory of Green Process and Engineering, Institute of Process Engineering, Chinese Academy of Sciences, 100190, Beijing, China. E-mail: zhanggj@ipe.ac.cn

<sup>b</sup>Center of Materials Science and Optoelectronics Engineering, University of Chinese Academy of Sciences, 100049, Beijing, China

<sup>c</sup>CAS Key Laboratory of Carbon Materials, Institute of Coal Chemistry, Chinese Academy of Sciences, Taiyuan, 030001, China

<sup>d</sup>Zhengzhou Tobacco Research Institute of CNTC, No 2 Fengyang Street, Zhengzhou High-Tech Development District, Henan, China, 450001, E-mail: lib@ztri.com.cn

<sup>e</sup>Chemistry and Chemical Engineering Guangdong Laboratory, Shantou, 515031 China

<sup>f</sup>Beijing Engineering Research Center of Printed Electronics, Beijing Institute of Graphic Communication, Beijing, China

<sup>#</sup>Equal contribution

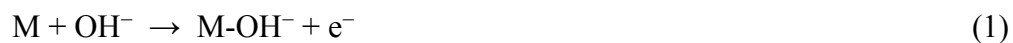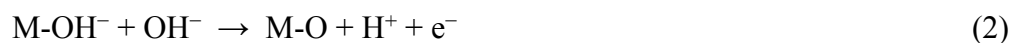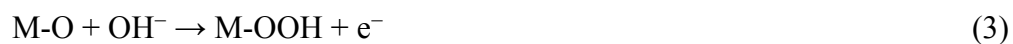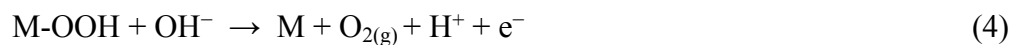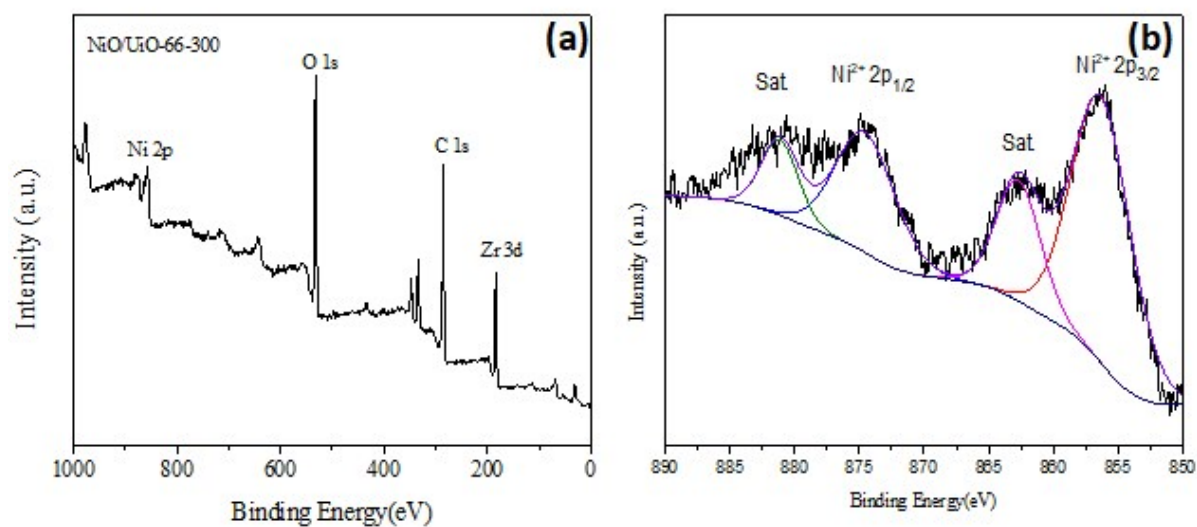

Figure S1. (a) Survey spectrum of NiO/Uio-66-300 and (b) XPS spectra of Ni 2p

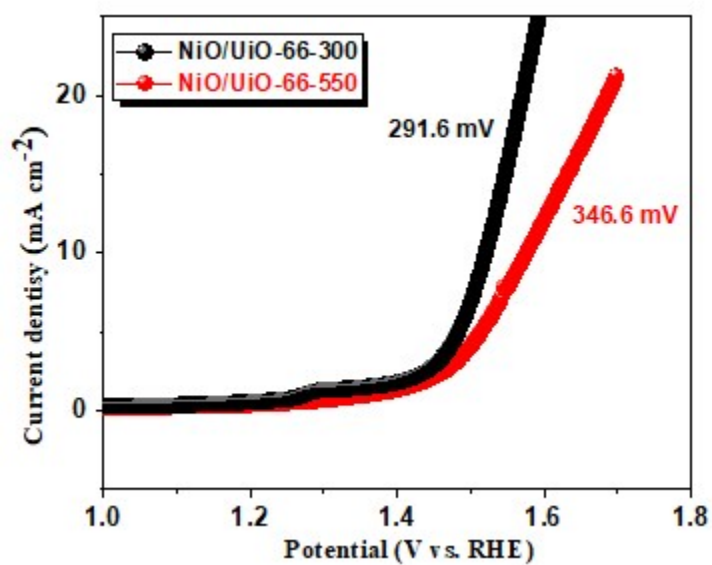

Figure S2. OER polarization curves of NiO/Uio-66-300, and NiO/Uio-66-550

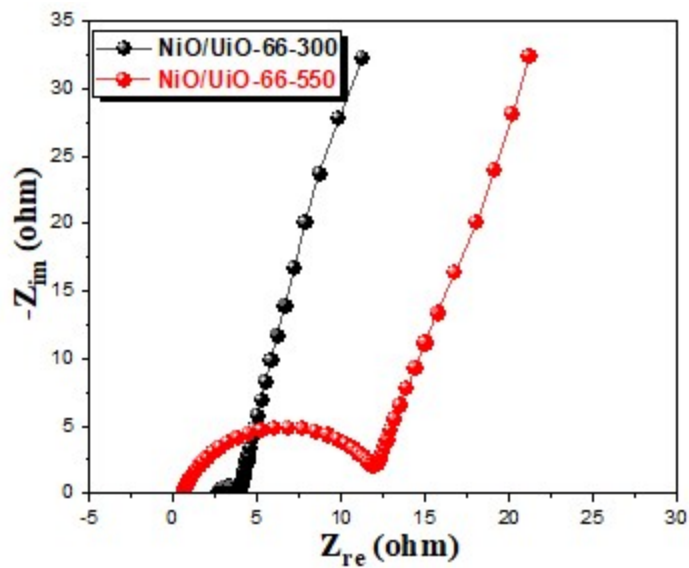

Figure S3. EIS of NiO/Uio-66-300, and NiO/Uio-66-550

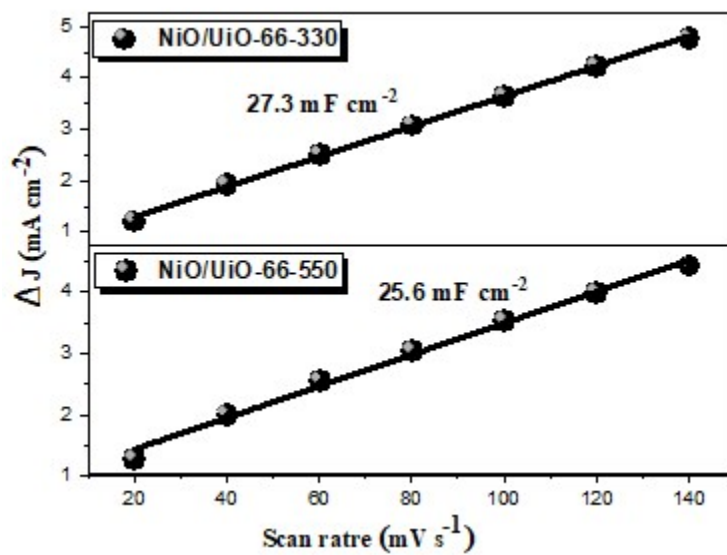

Figure S4.  $C_{di}$  of NiO/Uio-66-300, and NiO/Uio-66-550

Table S1. OER performance comparisons of some recently published heterostructure catalysts

| Catalysts                                                                          | Mass loading (Mg/cm <sup>2</sup> ) | Electrolyte | Overpotential at 10 mA cm <sup>-2</sup> (mV vs. RHE) | References |
|------------------------------------------------------------------------------------|------------------------------------|-------------|------------------------------------------------------|------------|
| CoO <sub>x</sub> /UiO-66-300                                                       | 0.3                                | 1 M KOH     | 283                                                  | This work  |
| NiO/UiO-66-300                                                                     | 0.3                                | 1 M KOH     | 291                                                  | This work  |
| 2.5Fe-NiCoP/PBA HNCs                                                               | 0.2                                | 1 M KOH     | 290                                                  | 1          |
| RuO <sub>2</sub> /CeO <sub>2</sub> heterostructure                                 | 0.28                               | 1 M KOH     | 350                                                  | 2          |
| Co <sub>3</sub> O <sub>4</sub> /Fe <sub>2</sub> O <sub>3</sub> nanocubes           | 3.0                                | 1 M KOH     | 310                                                  | 3          |
| Ultrathin Co <sub>3</sub> O <sub>4</sub> nanomeshes                                | ~0.34                              | 1 M KOH     | 307                                                  | 4          |
| Fe-CoOOH/graphene                                                                  | 0.2                                | 1 M KOH     | 330                                                  | 5          |
| MoS <sub>x</sub> - encapsulated Co(OH) <sub>2</sub> nanosheets                     | 0.2                                | 0.1 M KOH   | 350                                                  | 6          |
| Co-BPDC/Co-BDC heterostructure                                                     | 0.28                               | 1 M KOH     | 335                                                  | 7          |
| Ni-BDC/Ni(OH) <sub>2</sub> heterostructure                                         | -                                  | 1 M KOH     | 320                                                  | 8          |
| Se-(CoFe)S <sub>2</sub> heterostructure                                            | -                                  | 1 M KOH     | 281                                                  | 9          |
| Ni-MOF/LDH heterostructure                                                         | -                                  | 1 M KOH     | 220                                                  | 10         |
| Ni <sub>3</sub> S <sub>2</sub> -Co <sub>9</sub> S <sub>8</sub> heterostructure     | -                                  | 1 M KOH     | 294                                                  | 11         |
| Co <sub>9</sub> S <sub>8</sub> /Ni <sub>3</sub> S <sub>2</sub> /NF heterostructure | -                                  | 1 M KOH     | 227                                                  | 12         |
| Ni <sub>3</sub> S <sub>2</sub> @Co(OH) <sub>2</sub> /NF heterostructure            | -                                  | 1 M KOH     | 290                                                  | 13         |
| NCS-0.5/NF heterostructure                                                         | -                                  | 1 M KOH     | 340                                                  | 14         |
| NiO/NiS heterostructure                                                            | -                                  | 1 M KOH     | 209                                                  | 15         |

## Supplementary References

- 1 D. Li, C. Liu, W. Ma, S. Xu, Y. Lu, W. Wei, J. Zhu and D. Jiang, *Electrochim. Acta*, DOI:10.1016/j.electacta.2020.137492.
- 2 S. M. Galani, A. Mondal, D. N. Srivastava and A. B. Panda, *Int. J. Hydrogen Energy*, 2020, **45**, 18635–18644.
- 3 X. Wei, Y. Li, H. Peng, D. Gao, Y. Ou, Y. Yang, J. Hu, Y. Zhang and P. Xiao, *Chem. Eng. J.*, 2019, **355**, 336–340.
- 4 Y. Li, F. M. Li, X. Y. Meng, S. N. Li, J. H. Zeng and Y. Chen, *ACS Catal.*, 2018, **8**, 1913–1920.
- 5 X. Han, C. Yu, S. Zhou, C. Zhao, H. Huang, J. Yang, Z. Liu, J. Zhao and J. Qiu, *Adv. Energy Mater.*, DOI:10.1002/aenm.201602148.
- 6 F. Sun, C. Li, B. Li and Y. Lin, *J. Mater. Chem. A*, 2017, **5**, 23103–23114.
- 7 Q. Zha, F. Yuan, G. Qin and Y. Ni, *Inorg. Chem.*, 2020, **59**, 1295–1305.
- 8 D. Zhu, J. Liu, L. Wang, Y. Du, Y. Zheng, K. Davey and S. Z. Qiao, *Nanoscale*, 2019, **11**, 3599–3605.
- 9 Y. Song, X. Zhao and Z. H. Liu, *Electrochim. Acta*, 2021, **374**, 137962.
- 10 W. Da Zhang, Q. T. Hu, L. L. Wang, J. Gao, H. Y. Zhu, X. Yan and Z. G. Gu, *Appl. Catal. B Environ.*, 2021, **286**, 119906.
- 11 R. Zhang, L. Cheng, Z. Wang, F. Kong, Y. Tsegazab, W. Lv and W. Wang, *Appl. Surf. Sci.*, 2020, **526**, 146753.
- 12 F. Du, L. Shi, Y. Zhang, T. Li, J. Wang, G. Wen, A. Alsaedi, T. Hayat, Y. Zhou and Z. Zou, *Appl. Catal. B Environ.*, 2019, **253**, 246–252.
- 13 X. Du, P. Che, Y. Wang, C. Yuan and X. Zhang, *Int. J. Hydrogen Energy*, 2019, **44**, 22955–22961.
- 14 J. Lin, H. Wang, X. Zheng, Y. Du, C. Zhao, J. Qi, J. Cao, W. Fei and J. Feng, *J. Power Sources*, 2018, **401**, 329–335.
- 15 N. A. Khan, N. Rashid, M. Junaid, M. N. Zafar, M. Faheem and I. Ahmad, *ACS Appl. Energy Mater.*, 2019, **2**, 3587–3594.
